# Supplementary material for: Smart building block with colored radiative cooling devices and quantum dot light emitting diodes
Source: Royal Society of Chemistry journal article supplement (doi:10.1039/d3nr04884e), 2024-01-01
Supplement: d3nr04884e1.pdf [file d3nr04884e1.pdf]

## Supporting Information

# Smart Building Block with Colored Radiative Cooling Devices and Quantum Dot Light Emitting Diodes

Sang Yeop Lee<sup>a</sup>, Dongwoo Chae<sup>a</sup>, Jungho Kim<sup>b</sup>, Seongkeun Oh<sup>a</sup>, Hangyu Lim<sup>a</sup>, Jiwan Kim<sup>b\*</sup>, Heon Lee<sup>a\*</sup>, and Soong Ju Oh<sup>a\*</sup>

### Evaluation of RC performance

The cooling power,  $P_{cooling}$  was calculated based on the following energy balance equation:

$$P_{cooling}(T, T_{amb}) = P_{rad}(T) - P_{amb}(T_{amb}) - P_{solar} - P_{non-rad}(T, T_{amb}), (1)$$

where

$$P_{rad}(T) = \int_0^{2\pi} \int_0^{\frac{\pi}{2}} \int_0^{\infty} I_{BB}(T, \lambda) \varepsilon(\lambda, \theta) \cos\theta \sin\theta d\lambda d\theta d\varphi, (2)$$

indicates the power with thermal radiation of the surface of the object and

$$P_{amb}(T_{amb}) = \int_0^{2\pi} \int_0^{\frac{\pi}{2}} \int_0^{\infty} I_{BB}(T_{amb}, \lambda) \varepsilon(\lambda, \theta) \varepsilon_{amb}(\lambda, \theta) \cos\theta \sin\theta d\lambda d\theta d\varphi, (3)$$

denotes the power loss from the object's absorption of atmospheric emission.

$$P_{solar} = \int_0^{\infty} I_{solar}(\lambda) \varepsilon(\lambda, \theta) d\lambda, (4)$$

represents the power loss by the object's solar absorption.

$$P_{non-rad}(T, T_{amb}) = h_c(T_{amb} - T), (5)$$

expresses the power loss caused by nonradiative conduction and convection.

Here,  $I_{BB}$ ,  $\varepsilon_{atm}(\lambda, \theta)$ ,  $h$ ,  $c$ ,  $k_B$ ,  $I_{solar}$  represent blackbody radiation density, spectral emissivity of the atmosphere, Planck's constant, speed of light, Boltzmann constant, and solar power density, respectively.  $P_{cooling}(T) > 0$  indicates the subambient cooling of the sample, and  $\Delta T_{cooling}$  is calculated using the equation  $\Delta T_{cooling} = T - T_{amb}$ .

The following equations were used to determine the reflectance ( $R$ ), transmittance ( $T$ ), and absorptivity ( $A$ ) in the solar region ( $R_{solar}$ ,  $T_{solar}$ , and  $A_{solar}$ ):

$$X_{solar} = \int_{0.3 \mu m}^{2.5 \mu m} \frac{I_{solar}(\lambda)X(\lambda)}{I_{solar}(\lambda)} d\lambda, (6)$$

where  $X$  denotes reflectance, transmittance, or absorption. The following equation was used to derive the emissivity ( $\epsilon$ ) in the atmospheric window: <sup>1,2</sup>

$$\epsilon_{LWIR} = \int_{8 \mu m}^{13 \mu m} \frac{I_{BB}(T_{amb}, \lambda)\epsilon(\lambda)}{I_{BB}(T_{amb}, \lambda)} d\lambda, (7)$$

### Fabrication and optical properties of Ag-PDMS and RC paint radiative cooling device

An Ag-PDMS radiative cooling device uses an Ag film deposited by thermal evaporation as a reflector for visible light and coated with a 100  $\mu m$  PDMS layer on top of it to increase absorption and emission efficiency in the mid-infrared range (Figure s1a). In the case of an RC paint cooling device, RC paint can be used instead of Ag and PDMS. The RC paint was applied to a glass substrate. The visible light absorption of the produced Ag-PDMS and RC paint cooling devices was measured using UV-vis spectroscopy (Figure s2a). We confirmed that the RC paint had a low absorption rate of 0.21% at 550 nm under visible light and a very low absorption rate of less than 1% over the entire range of 400–800 nm, thereby effectively preventing solar heating. The absorption rate of the Ag-PDMS cooling device was 3.14% at 550 nm and increased as it approached 400 nm, measuring 8.56% at 400 nm. The absorption rate and emission efficiency in the mid-infrared range were measured using Fourier-transform infrared (FT-IR) spectroscopy (Figure s2b). The Ag-PDMS cooling device and RC paint cooling device had very high absorption rates of over 80% in the range of 8–13  $\mu m$ , indicating that effective heat exchange with space could occur.

## Supplementary Figures

(a)

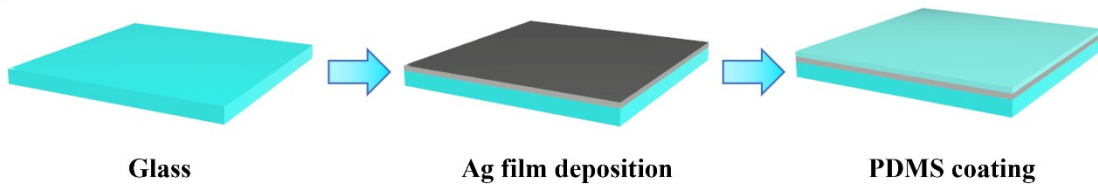

(b)

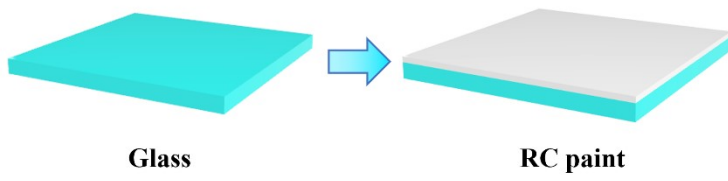

Figure S1. (a) Fabrication process of Ag-PDMS radiative cooling device. (b) Fabrication process of RC paint radiative cooling device.

---

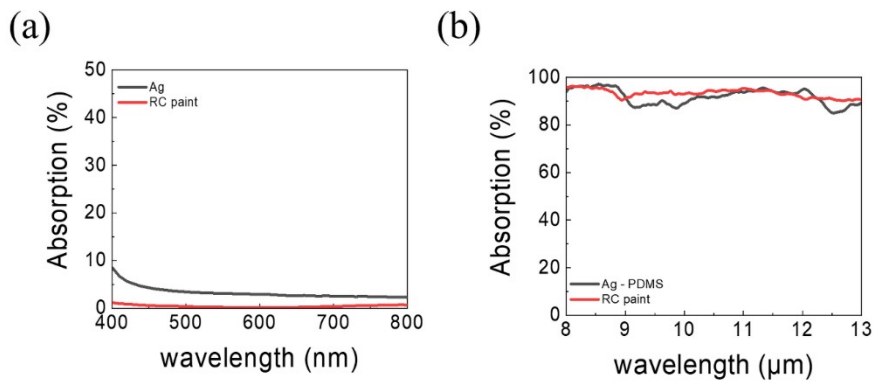

Figure S2. (a) UV-vis spectra of Ag-PDMS and RC paint radiative cooling devices. (b) FT-IR spectra of Ag-PDMS and RC paint radiative cooling devices.

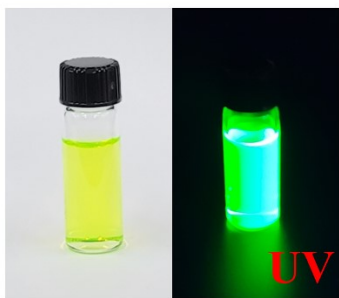

Figure S3. Image of the synthesized CdZnSeS/ZnS core-shell nanocrystals under white light (left) and UV light (right).

---

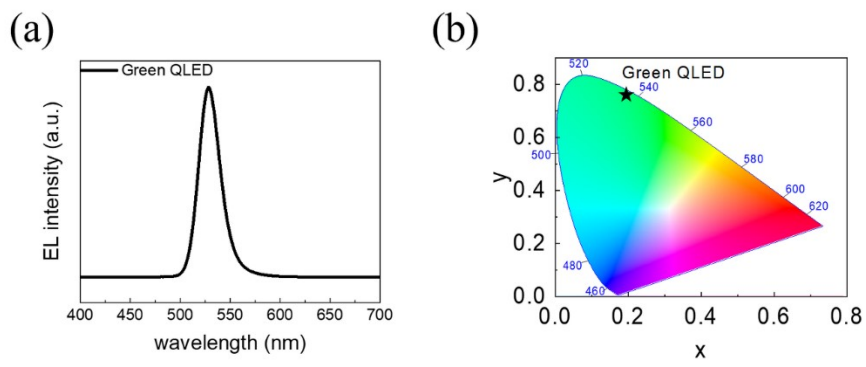

Figure S4. (a) Electroluminescence spectra of the fabricated inverted QLED. (b) CIE 1931 color coordinate of the fabricated inverted QLED.

---

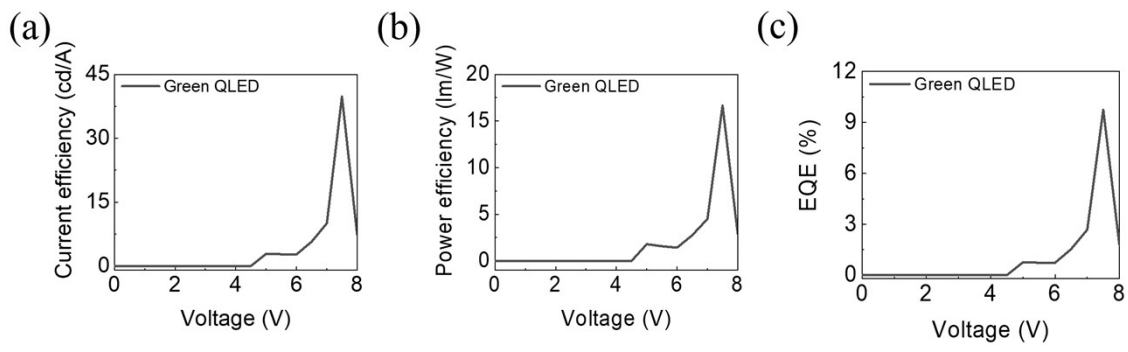

Figure S5. (a) Current efficiency of the fabricated inverted QLED. (b) Power efficiency of the fabricated inverted QLED. (c) External quantum efficiency of the fabricated inverted QLED.

---

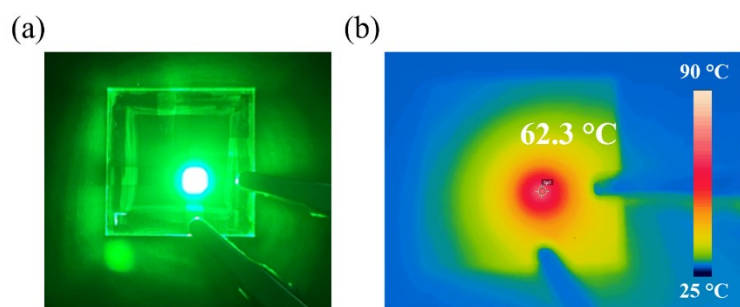

Figure S6. (a) Image of the maximum brightness of an inverted QLED at 7.5 V. (b) Infrared image of the maximum temperature of an inverted QLED at 7.5 V.

---



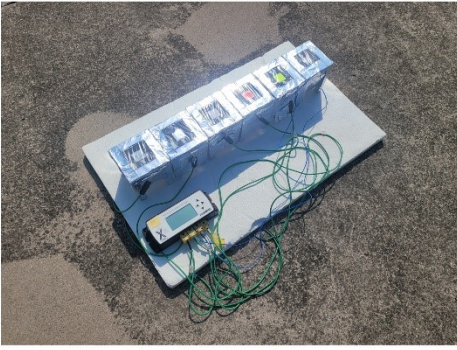

Figure S7. Image of the equipment for the outdoor measurement of the cooling performance.

---

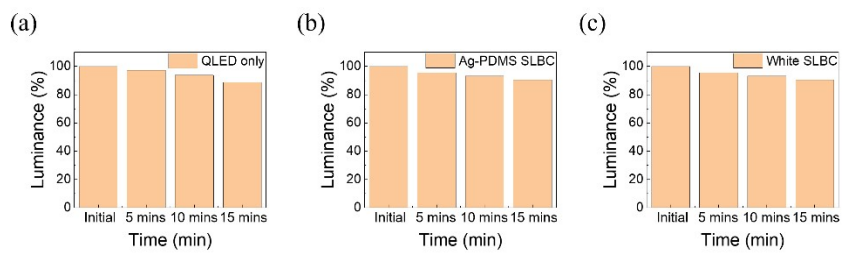

Figure S8. (a) Reductions in the luminances of the QLED-only device and the (b) Ag-PDMS and (c) white SLBCs.

---

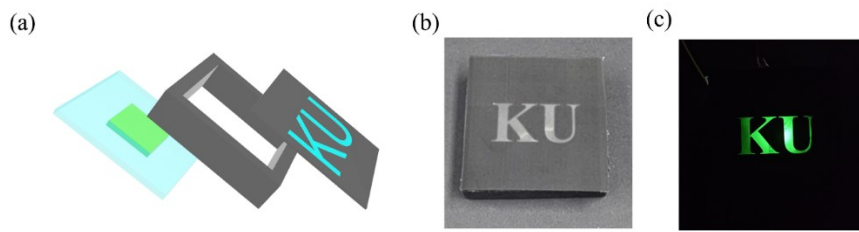

Figure S9. (a) Schematic of imitation SLBC billboard. (b) Image of imitation SLBC billboard. (c) Image of imitation SLBC billboard under 6 V.

---

## References

- 1 A. P. Raman, M. A. Anoma, L. Zhu, E. Rephaeli and S. Fan, *Nature*, 2014, **515**, 540–544.
- 2 J. Mandal, Y. Fu, A. C. Overvig, M. Jia, K. Sun, N. N. Shi, H. Zhou, X. Xiao, N. Yu and Y. Yang, *Science*, 2018, **362**, 315–319.
